# Supplementary material
Source: HighWire-hosted journal article supplement (https://cmaj.ca/highwire/filestream/58778/field_highwire_adjunct_files/0/image-novit-1-at.pdf)

**Appendix 1:** Orbital CT scan (A) showing enophthalmos and an ill-defined mass in the antero-superior orbit (arrow) infiltrating the eyelids and orbital septum on the left side. A biopsy showed nests of infiltrating tumor cells at low (10x magnification; left) and high power (40x magnification; right); immunohistochemistry confirmed the cells to be HER2 negative and estrogen-receptor positive metastatic breast carcinoma.

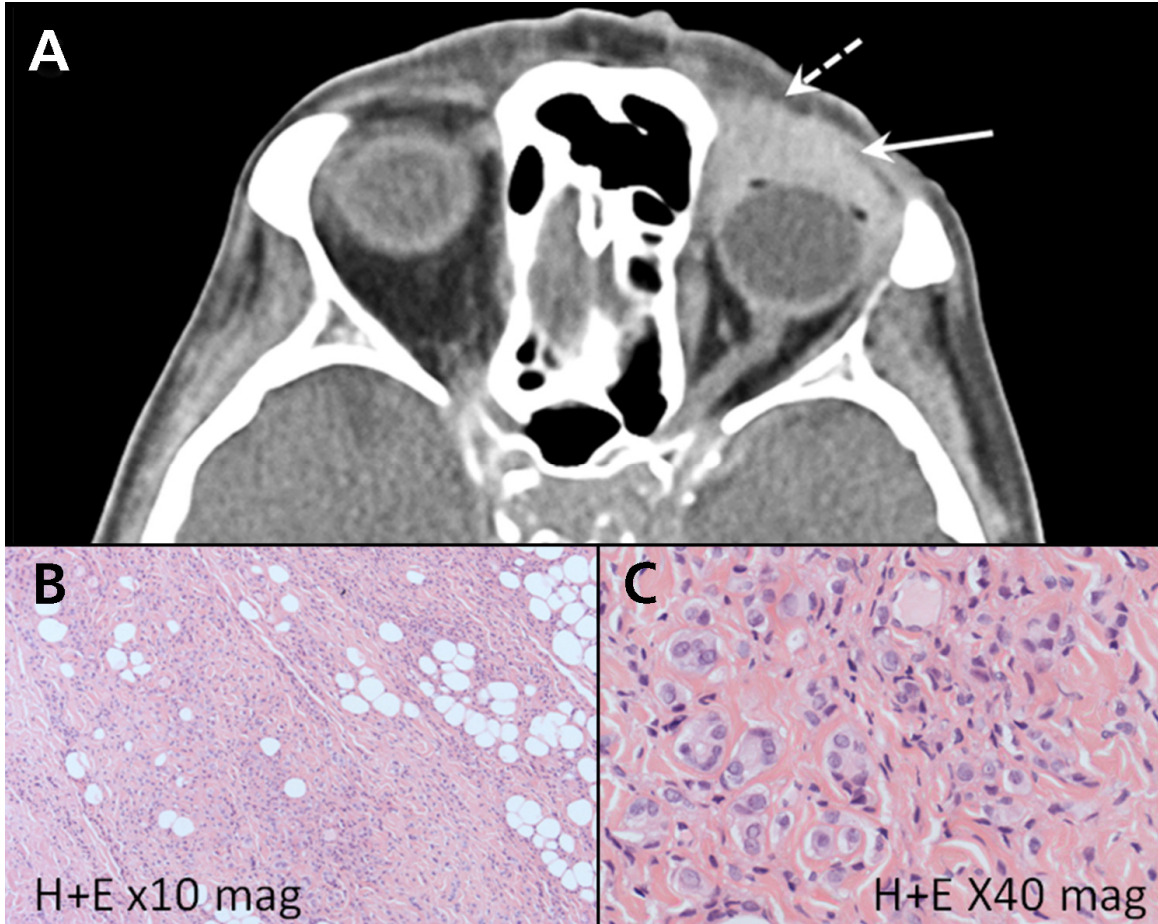

Supplement: image-novit-1-at.pdf [file image-novit-1-at.pdf]
